# Capacity of countries to reduce biological invasions

Guillaume Latombe<sup>ab,1</sup>, Hanno Seebens<sup>c</sup>, Bernd Lenzner<sup>a</sup>, Franck Courchamp<sup>d</sup>, Stefan Dullinger<sup>a</sup>, Marina Golivets<sup>e</sup>, Ingolf Kühn<sup>efg</sup>, Brian Leung<sup>h</sup>, Núria Roura-Pascual<sup>i</sup>, Emma Cebrian<sup>jk</sup>, Wayne Dawson<sup>l</sup>, Christophe Diagne<sup>d</sup>, Jonathan M. Jeschke<sup>mno</sup>, Cristian Perez-Granados<sup>ip</sup>, Chunlong Liu<sup>dmno</sup>, Dietmar Moser<sup>a</sup>, Anna Turbelin<sup>d</sup>, Piero Visconti<sup>q</sup>, Franz Essl<sup>a</sup>

<sup>a</sup>BioInvasions, Global Change, Macroecology-Group, Department of Botany and Biodiversity Research, University Vienna, Rennweg 14, 1030 Vienna

<sup>b</sup>Institute of Evolutionary Biology, The University of Edinburgh, King's Buildings, Edinburgh EH9 3FL, United Kingdom

<sup>c</sup>Senckenberg Biodiversity and Climate Research Centre, Senckenberganlage 25, 60325 Frankfurt, Germany

<sup>d</sup>Université Paris-Saclay, CNRS, AgroParisTech, Ecologie Systématique Evolution, 91405 Orsay, France

<sup>e</sup>Helmholtz Centre for Environmental Research – UFZ, Theodor-Lieser-Str. 4, 06120 Halle, Germany

<sup>f</sup>Martin Luther University Halle-Wittenberg, Geobotany and Botanical Garden, Halle, Germany

<sup>g</sup>German Centre for Integrative Biodiversity Research (iDiv) Halle-Jena-Leipzig Deutscher Platz 5e, 04103 Leipzig, Germany; ORCID: 0000-0003-1691-8249

<sup>h</sup>Department of Biology, McGill University, Montreal, Quebec, Canada. H3A 1B1.

<sup>i</sup>Departament de Ciències Ambientals, Facultat de Ciències, Universitat de Girona, Girona, Catalonia.

<sup>j</sup>Centre d'Estudis Avançats de Blanes-CSIC, Girona, Spain;

<sup>k</sup>GRMAR, Institute of Aquatic Ecology, University of Girona, Girona, Spain

<sup>l</sup>Department of Biosciences, Durham University, South Road, Durham, DH1 3LE, UK

<sup>m</sup>Institute of Biology, Freie Universität Berlin, 14195 Berlin, Germany

<sup>n</sup>Leibniz Institute of Freshwater Ecology and Inland Fisheries (IGB), 12587 Berlin, Germany

<sup>o</sup>Berlin-Brandenburg Institute of Advanced Biodiversity Research (BBIB), 14195 Berlin, Germany

<sup>p</sup>Ecology Department. Universidad de Alicante, 03080. Alicante. Spain

<sup>q</sup>Biodiversity, Ecology and Conservation Group, International Institute for Applied System Analyses. A-2361 Laxenburg, Austria

<sup>1</sup>Corresponding author: [latombe.guillaume@gmail.com](mailto:latombe.guillaume@gmail.com)

34 **Abstract**

35

36 The extent and impacts of biological invasions on biodiversity are largely shaped by an array of socio-  
37 ecological predictors, which exhibit high variation among countries. Yet a global synthetic perspective of  
38 how these factors vary across countries is currently lacking. Here, we investigate how a set of five socio-  
39 ecological predictors (Governance, Trade, Environmental Performance, Lifestyle and Education,  
40 Innovation) explain i) country-level established alien species (EAS) richness of eight taxonomic groups,  
41 and ii) country capacity to prevent and manage biological invasions and their impacts. Trade and  
42 Governance together best predicted the average EAS richness, increasing variance explained by up to  
43 54% compared to models based on climatic and spatial variables only. Country-level EAS richness  
44 increased strongly with Trade, whereas high level of Governance resulted in lower EAS richness.  
45 Historical (1996) levels of Governance and Trade better explained response variables than current (2015)  
46 levels. Thus, our results reveal a historical legacy of these two predictors with profound implications for  
47 the future of biological invasions. We therefore used Governance and Trade to define a two-dimensional  
48 socio-economic space in which the position of a country captures its capacity to address issues of  
49 biological invasions. Our results provide novel insights into the complex relationship between socio-  
50 ecological predictors and biological invasions. Further, we highlight the need for designing better policies  
51 and management measures for alien species, and for integrating biological invasions in global  
52 environmental scenarios.

53

54

55 **Keywords:** environmental performance, governance, innovation, invasive alien species, lifestyle,  
56 scenarios, trade

57

58

59

60

## 61 **Introduction**

62

63 The proliferation of alien species – i.e. species that are intentionally or unintentionally introduced by  
64 humans in regions beyond their native ranges – has become a signature of human-induced global  
65 environmental change. A substantial proportion of these species becomes a permanent addition to  
66 regional biota (established alien species – EAS hereafter), and a subset of these species, known as  
67 invasive alien species (IAS), are a leading cause of biodiversity decline (1–3) and can adversely affect  
68 human livelihoods (4–7). Globally, the number of EAS has been steadily increasing in recent decades,  
69 and this trend does not show any sign of saturation (8). Meanwhile, the current state and particularly the  
70 future trajectories of EAS impacts remain highly uncertain (9, 10). Still, there is a distinct lack of  
71 consideration for the impacts of biological invasions in developing long-term global biodiversity  
72 conservation frameworks and scenarios (11, 12).

73

74 Environmental and economic factors have been repeatedly demonstrated to be important predictors for  
75 biological invasions at the global scale (13–16). Additionally, experts also consider political, social and  
76 technological factors to be important (10, 17). For example, countries with low Human Development  
77 Index (18) are severely constrained in their capacity to manage biological invasions and mitigate their  
78 impacts (19). In addition, the relationship between governance and biological invasions is complex, as  
79 countries with high levels of governance (i.e. countries in which governments are selected, monitored and  
80 replaced democratically, in which governments can effectively formulate and implement sound policies,  
81 and in which citizens and the state respect the institutions that govern economic and social interactions  
82 among them (20)) are more susceptible to biological invasions if they also have high per capita-GDP (21).  
83 Low levels of governance and high levels of corruption have also been associated with higher exports of  
84 alien species, as regulations of outbound pathways are poorly implemented and subsequently lead to  
85 greater potential rates of introduction in importing countries (22). In many instances, species are also  
86 deliberately released because of their perceived or realized economic benefits. For instance, plants of the  
87 genera *Melinis* and *Urochloa* were released in Brazil as livestock feed, but are now known to  
88 fundamentally alter the ecosystems in which it is established via dominance and changes in fire regimes  
89 (23). In response to growing threats from biological invasions, many countries with high richness of alien  
90 species have expanded and implemented new legislations on alien species since the 1990s (24).  
91 Quantitative analyses are nonetheless scarce for political, social and technological predictors.

92

93 Understanding how socio-ecological predictors together shape the current and future state of biological  
94 invasions at the country scale is crucial to design and implement efficient policies and future global

95 scenarios for biological invasions (11, 17). Recent global studies considering the combined role of social,  
96 political, environmental and socio-economic predictors for the future of biological invasions have mostly  
97 relied on expert knowledge (10, 25). Therefore, there is a need for a comprehensive quantitative  
98 assessment of these relationships.

99

100 Here, we compare 125 countries (excluding some regions separate from mainland, which can have  
101 different invasion dynamics) against a set of political, economic, environmental, social and technological  
102 predictors, which are considered to be essential drivers of biological invasions (10). For each country, we  
103 quantify current and – if available – historical conditions using five predictors (Governance, Trade,  
104 Environmental performance, Lifestyle and Education, and Innovation; Table 1). We i) examine the  
105 relationships between these predictors and then relate their ii) current (2015) and iii) past (1996) values to  
106 EAS richness per country. As a response variable, we use country-level EAS richness of eight taxonomic  
107 groups (plants, ants, amphibians, reptiles, fishes, birds and spiders) based on the most comprehensive  
108 country-level data set on EAS richness (15). Moreover, we relate these predictors to the national response  
109 capacities to manage and mitigate biological invasions and their impacts presented in (19).

110

111 Based on the results from these analyses, we show how Governance and Trade can be used to identify a  
112 two-dimensional, socio-economic space describing the capacity of countries to mitigate alien species  
113 spread and impact. We assess how different geopolitical groups of countries (Figure S1) perform in this  
114 socio-economic space. Finally, we show how countries and geopolitical regions have changed their  
115 position in this socio-economic space since 1996, and explain why divergences between country  
116 trajectories are crucial to capture the main challenges they are currently facing to tackle invasions.

117

118

## 119 **Results**

120

121 **Relationships between predictors.** Governance (quantified as the mean of Rule of Law, Government  
122 Effectiveness, Voice and Accountability and Control of Corruption; Table 1), Environment (measured by  
123 the Environmental Performance Index, which includes land use; Table 1) and Lifestyle and Education  
124 (quantified as the mean of the average level of education of a population, the Information Globalization  
125 Index and the Cultural Globalization Index; Table 1) were highly correlated ( $0.77 \leq r \leq 0.85$ ) across  
126 countries, and less so with Trade (measured as total imports in Good and Services;  $r \leq 0.59$ ). Innovation  
127 (measured by the Global Innovation Index) was moderately correlated with all other predictors ( $0.59 \leq r \leq$

128 0.62). A principal component analysis (PCA) confirmed the distinction between these three groups of  
129 predictors (Figure S2g).

130

131 **Predictors and numbers of established alien species in countries.** Using recent (2015) data on  
132 predictors, all mixed-effects models using only one of the five predictors (in addition to climatic and  
133 spatial variables, including mean annual temperature, mean annual precipitation, country area, sampling  
134 effort, mainland / inland status and broad geographical region; see Methods) significantly explained  
135 observed overall richness of EAS, increasing marginal  $r^2$  values by between 8% and 25% in absolute  
136 values (between 15% and 46% relative increase) compared to models only including climatic and spatial  
137 variables (Table 2). Model comparison using the Akaike Information Criterion corrected for small-sample  
138 size (AICc) revealed that Trade was the best predictor of richness for overall EAS data and for most  
139 individual taxonomic groups, i.e. plants (together with Governance), ants, amphibians, reptiles, fishes and  
140 birds (Table 2, Figure S3). Meanwhile, for mammals and spiders, Lifestyle and Education was the most  
141 important predictor. The effect size varied between taxonomic groups, being mostly null for ants and  
142 representing almost half of the marginal variance for fishes. The relationships between several predictors  
143 and EAS richness were non-linear for most taxa. For Trade, the relationship was positive quadratic for  
144 most taxonomic groups, indicating an acceleration of EAS richness as Trade increased (the relationship  
145 was cubic, slightly decelerating at high Trade values for birds). For Innovation, the relationship was also  
146 quadratic and accelerating for all taxa. In contrast, the relationships between EAS richness and  
147 Governance, Environmental Performance and Lifestyle and Education were either quadratic or cubic and  
148 tended to decrease at high values (Table 2, Figure S3).

149

150 The combination of Trade and Governance levels of 1996 or averaged over 1996–2015 (i.e. considering  
151 both predictors as fixed effects, without interaction) explained EAS richness better than any predictor  
152 individually or combining Trade and Governance for 2015 (Figure 1, Table S1). Models only including  
153 historical Trade (i.e. 1996 or averaged over 1996–2015) resulted in the best-fitting models for plants and  
154 amphibians, and for overall EAS richness. Models using the 2015 data were always worse than models  
155 using historical data.

156

157 **Predictors and national response capacities.** Lifestyle and Education better explained national  
158 proactive capacity to prevent or rapidly respond to emerging IAS than the other predictors for the 2015  
159 data (marginal  $r^2 = 0.47$ ; Table 2, Figure S4). The second-best model was the one incorporating  
160 Governance (marginal  $r^2 = 0.32$ ). For national reactive capacity, i.e. the expertise, resources and  
161 willingness to mitigate negative impacts caused by IAS, Trade had the lowest AIC value, but Lifestyle

162 and Education had the highest marginal  $r^2$  (Table 2). Model performances were higher for proactive than  
163 for reactive capacities (Table 2, Figure S4). Quadratic models performed best for all predictors for both  
164 types of national capacity, with positive quadratic terms indicating a disproportional strong increase in  
165 national capacity with increasing predictor values.

166

167 The level of Lifestyle and Education in 2015 also better explained national proactive capacity than any  
168 combination of historical predictors (Table S1). Average Governance between 1996 and 2015 was a  
169 better predictor than any other model incorporating Governance or Trade. This model showed an  
170 acceleration of national proactive capacity with better Governance (Figure 2). Trade for 1996 was the best  
171 predictor for reactive capacity and the relationships were linear for most taxonomic groups.

172

173 **Mapping countries according to national levels of predictors of invasions.** The five predictors  
174 selected here were interrelated, but Governance and Trade were the least correlated predictors (Figure  
175 S2). Since their historical values were also overall the best (or amongst the best) predictors for both EAS  
176 richness and national capacities, we selected Governance and Trade to map countries in a two-  
177 dimensional space defined by these two predictors (Figure 3). This two-dimensional approach represents  
178 the currently realized socio-economic space of country positions with respect to the main predictors of  
179 biological invasion. Contrary to a PCA, whose axes would depend on the data for a given year, using  
180 Governance and Trade enables us to assess how countries change their position in time in this fixed socio-  
181 economic space (see next section). Capturing country trajectories through time is crucial to understand the  
182 dynamics of biological invasions, since they depend on historical legacies.

183

184 Consistently with the intermediate, positive correlation between Governance and Trade mentioned above  
185 (Figure S2), countries were roughly distributed within an elongated ellipse in the two-dimensional space  
186 (Figure 3). Importantly, however, they were not evenly distributed across this ellipse. A cluster analysis  
187 revealed that countries can be grouped into four distinct clusters, closely matching the four sectors  
188 defined by Governance and Trade (Figure S5). The lower-left section of the socio-economic space  
189 contained countries that were characterized by low levels of both Trade and Governance. This section  
190 contained the highest number of countries, with 47 out of 125 countries, of which 23 are from the 27  
191 African countries used in our analyses. The upper-right section contained 39 countries with high levels of  
192 both Governance and Trade. This category mostly included Western European countries (26 out of 37  
193 countries) and some countries from other continents, including Australia, New Zealand, USA, Canada,  
194 Japan and Singapore. The upper-left section contained 23 countries with high levels of Trade but  
195 relatively low levels of Governance. This section mostly included Asian countries (9 out of 22 countries).

196 Finally, the lower-right section contained the smallest number of countries (16 countries), which were  
197 characterized by low levels of Trade and high levels of Governance. This section contained many island  
198 countries. Asian, South-American and African countries were spread over all four sectors, with Asian  
199 countries showing the highest variability in their distribution (Figure 3).

200

201 **Temporal changes in predictors.** Time lag phenomena are common in biological invasions, and our  
202 analyses showed that historical data better explained the currently observed EAS richness. We therefore  
203 analyzed the trajectories of countries in the two-dimensional socio-economic space defined by  
204 Governance and Trade during the past 20 years (Figure 4). All countries have experienced an increase in  
205 level of Trade from 1996 to 2018, but changes in Governance were more variable. Countries from  
206 continents with high levels of economic development (Australia, Europe and North America)  
207 demonstrated high levels of Governance (Figure 4a). Their level of Governance nonetheless tended to  
208 increase between 1996 and 2003, and then decreased until 2018. It was even lower in 2018 than in 1996  
209 for Northern America (-0.11 in our standardized scale for this predictor). Governance in Northern African  
210 countries has remained at a low level over this period. In contrast, West and East African countries started  
211 at a similar level as Northern African countries but saw the second and third largest increase in their level  
212 of Governance over time (+0.17 and +0.16), especially after 2013 for West Africa. Asian countries  
213 experienced the largest increase in their level of Governance on average (+0.18). European countries that  
214 are not members of the EU experienced a moderate increase (+0.1). Asian countries in the Middle-East  
215 saw a rapid increase in the level of Governance between 1996 and 2000 (+0.32), with stable levels of  
216 Trade. After 2000, this trend reversed, with a stagnation in the level of Governance and an increase in the  
217 level of Trade. Middle Eastern, Caribbean, and especially Southern African countries saw the largest  
218 declines in their levels of Governance on average (-0.13, -0.18 and -0.27, respectively).

219

220 Results were much more heterogeneous at the country level, with some countries having large increases,  
221 decreases or fluctuations in their levels of Governance (Figure 4b,c). Overall, countries with high levels  
222 of Governance in 1996 mostly remained close to their initial level. In contrast, countries with intermediate  
223 or low levels of Governance changed in either direction. Georgia had the largest increase in level of  
224 Governance worldwide (+1.44; Figure 4b), whereas Venezuela had the largest decline (-1.18). Zimbabwe  
225 had the second largest decline over only 13 years (i.e. its decline was larger in 13 years than for any other  
226 country in 22 years; -1.1), then increased again, but without reaching its former level of Governance  
227 (Figure 4c). Ivory Coast had a similar trajectory, but it recovered better and ended with a higher level of  
228 Governance in 2018 than in 1996, making the third largest increase in only 13 years (+0.9).

229



230

## 231 **Discussion**

232

233 **Socio-ecological predictors of biological invasions.** Here, we provide the first comprehensive  
234 quantitative analysis of how countries perform in relation to a set of key socio-ecological predictors of  
235 biological invasions and of the capacity of countries to mitigate their impacts. Although economic and  
236 environmental factors are often considered important and are well-understood, we show that societal,  
237 technological and especially political factors are also essential for obtaining a comprehensive perspective  
238 on spatial and temporal changes in biological invasions. As expected from other studies (10, 14, 25–28),  
239 Trade was consistently the best predictor of EAS richness in one-predictor models, whereas the  
240 combination of Trade and Governance as main effects best explained EAS richness for most taxa in two-  
241 predictor models. These two predictors capture different aspects of biological invasions. Trade can  
242 facilitate the transportation of propagules and is therefore primarily linked to the introduction stage of  
243 biological invasions (29). In contrast, Governance is related to all invasion stages, from introduction to  
244 establishment and spread of alien species, as it is a proxy for the capacity and willingness to design and  
245 implement adequate policies to prevent alien species from transiting from one stage to the other.  
246 Nonetheless, Governance appears to limit biological invasions at high levels only (Figure 1). This likely  
247 reflects the complex interactions between Governance and other factors, including that awareness and  
248 willingness to respond decisively to biological invasions may increase only once substantial negative  
249 impacts of IAS have been widely observed in a country.

250

251 Lifestyle and Education is another predictor that proved to be important in our analyses but has been  
252 largely neglected so far. Lifestyle and Education was the best predictor of EAS richness for mammals and  
253 spiders when considering the 2015 data only. Lifestyle and Education was calculated by averaging the  
254 educational level of the population, the information globalization index and the cultural globalization  
255 index. Doing so enabled us to capture the potential level of understanding of complex issues such as  
256 biological invasions, but also connections with other cultures and countries, and the perception of nature  
257 (Table 1). Lifestyle and Education therefore has implications for alien species dispersal and  
258 establishment, e.g. via recreational activities and tourism, or mode of consumption. Importantly, Lifestyle  
259 and Education was also the best predictor for proactive national capacity and a good predictor for reactive  
260 national capacity. It is difficult at this stage to explain if this relationship is only correlative (countries  
261 investing in the education of their populations also tend to implement environmental policies) or if there  
262 is a causal relationship (populations with high levels of education may vote for governments more  
263 inclined to design and implement environmental laws). Our results nonetheless show that factors related



264 to education and likely environmental awareness of a population, are important for predicting EAS  
265 richness and how countries will assess and react to the impacts caused by IAS.

266

267 **Effects of historical legacies on current levels of biological invasions.** Our results underscore that  
268 invasion debt plays a crucial role in explaining current levels of biological invasions (13). We found that  
269 historical data, where available (i.e. for Trade, Governance), consistently better explained current  
270 numbers of EAS than did recent data. Due to a lack of predictor data prior to 1996, we were not able to  
271 analyze if – and for how long – historical legacies extend beyond this time. Time lags may also occur for  
272 other predictors, for which historical data were not available.

273

274 Biological invasions are the result of a range of processes that operate at different stages of the invasion  
275 process (30). For instance, while new alien species are introduced in response to changes in propagule  
276 pressure, introduced species become naturalized in response to human-induced changes in the recipient  
277 region and societal responses (e.g. IAS management, legislation) are adopted in response to observed or  
278 anticipated negative impacts (e.g. 24). These processes may be associated with substantial lag times:  
279 newly introduced species are often detected after a recording lag (31, 32), as does their spread to new  
280 locations and conversely, the adoption of effective management (33). Similarly, our findings show that  
281 historical levels of Governance, which are essential for the design and implementation of policies and the  
282 management of IAS, have an imprint on current EAS richness in countries. In particular, countries with  
283 higher levels of Governance 20 years ago tended to be less invaded than countries with intermediate  
284 Governance. Complex interactions between predictors suggest that historical legacies may also apply to  
285 other predictors. For example, since Lifestyle and Education was the most important predictor for  
286 explaining proactive capacities of countries to address issues related to IAS (Figure S4), its relationship  
287 with EAS richness is likely to be subject to time lag. Past Lifestyle and Education may also be a good  
288 predictor of current EAS richness, and it will likely be highly important for shaping future trajectories of  
289 EAS richness, as policies and management actions can take time to have effect.

290

291 **A global picture of country positions in the socio-economic space and implications for invasive alien  
292 species management and policies.** Analyses of recent historical trajectories show that Trade has been  
293 increasing for all countries and will likely continue to do so in the next decades, with global freight  
294 demands predicted to increase three- to seven-fold between 2015 and 2050 (34, 35). Recent research has  
295 shown that under a business as usual scenario, we can expect a global increase in EAS richness of 36%  
296 between 2005 and 2050. The intensification of Trade will necessarily be followed by large increases in

297 species introductions, and may therefore cause EAS richness increase to largely exceed the business as  
298 usual estimations.

299

300 For Governance, recent historical trajectories are much less uniform across regions and countries. In  
301 particular, there are strong differences between different regions of the world, with increases for some  
302 regions, such as non-EU Europe and Asia, and declines for others, such as Central America and Southern  
303 Africa (Figure 4). Differences are even larger at the country level and future country-specific projections  
304 for biological invasions, which are currently missing, would likely be highly uncertain. Overall,  
305 Governance appears to have an effect on EAS richness at high levels only. Among geopolitical regions  
306 whose level of Governance increased between 1996 and 2018 (Figure 4a), increases appear to be  
307 insufficient to reach the level of Governance at which it has an effect. Worse, the level of Governance of  
308 most geopolitical regions stagnated or even decreased over this period. Unless this trend is reversed, this  
309 will likely exacerbate the establishment of alien species whose rate of introduction will have also been  
310 increased by increases in Trade.

311

312 Our results nonetheless show that countries strongly differ regarding socio-ecological predictors of  
313 invasions. All the predictors we quantified in these analyses are related to different aspects of biological  
314 invasions and can therefore influence the future state of biological invasions (10, 17). Although  
315 understanding the interactions between these predictors is beyond the scope of this publication, this  
316 implies that there are substantial opportunities for countries to mitigate the impacts of biological  
317 invasions in the future (e.g. identifying predictors with the largest leverage or the potential to improve  
318 country ability to address biological invasions). Given the time lags involved in biological invasions, and  
319 the historical legacies of socio-ecological predictors on EAS richness, delays in positive changes,  
320 especially concerning Governance, may result in important long-term consequences for biodiversity.

321

322 Scenarios on biodiversity change to inform decision-making are under development (36, 37), but  
323 biological invasions are not considered in these analytical frameworks, despite the recognition of the  
324 importance of their integration into global environmental policies (e.g. Sustainable Development Goals,  
325 (38)). The on-going discussion on global targets for biodiversity conservation for the decades to come,  
326 including revised and specific targets on biological invasions (39), highlights that integrating biological  
327 invasions into thematically broad assessments of environmental change is crucial. By revealing that large  
328 increases in levels of Governance are required to mitigate increases in EAS richness resulting from the  
329 expected intensification of Trade, and identifying the regions of the world where such changes are  
330 critically needed, our socio-economic space for biological invasions paves the way for such integration.

331

## 332 **Methods**

333

334 **Predictor selection and data.** Based on previous findings (10, 17), we considered five main predictors  
335 (Table 1): i) Governance, i.e. the capacity of a country to design and implement policies, including  
336 policies aimed at addressing biological invasions; ii) Trade, as the most important predictor of propagule  
337 pressure; iii) Environmental Performance Index, i.e. the level of sustainable use of abiotic and biotic  
338 components of the recipient environment, including land use; iv) Lifestyle and Education, i.e. factors  
339 influencing people's values and perception of nature, their understanding of the issue and their  
340 connections with other cultures and countries, with implications for alien species dispersal and  
341 establishment, e.g. via recreational activities and tourism, or mode of consumption; and v) Innovation, i.e.  
342 technological progress which can enhance the knowledge and technological means to manage biological  
343 invasions. To quantify each predictor, we searched for data available at the country scale from open  
344 access repositories with good transparency about the methods used to collate these variables, to ensure  
345 data quality and long-term maintenance. This resulted in a total of 12 variables extracted from the World  
346 Bank data repository (40), the KOF Swiss Economic Institute (41, 42), the Global Innovation Index (43)  
347 and the Wittgenstein Centre for Demography and Global Human Capital (44) (Table 1).

348

349 We extracted data on the selected variables for 2015, as this year corresponded to the final year for which  
350 data of the response variable, EAS richness, have been considered in our data set (see below). When data  
351 for this year were not available for a country, we used data from the most recent preceding year until  
352 2010. To explore potential legacies of historical predictor conditions, we extracted historical data for  
353 Governance and Trade for each year from 1996 onwards, which was the first year for which these data  
354 were available for Governance; for the other predictors, data were available only for the more recent  
355 history. Altogether, predictor data were available for 125 countries (excluding some regions separate from  
356 mainland, which can have different invasion dynamics), which were then considered in the analyses (see  
357 Figure S1).

358

359 Further, following (15) we extracted mean annual temperature (BIO1) and mean annual precipitation  
360 (BIO12) for the years 1960 to 1990 from WorldClim ([www.worldclim.org](http://www.worldclim.org)); for each country, we  
361 calculated mean annual temperature and total annual precipitation as the mean of raster cells within  
362 country borders. To control for area as well as sampling effect, we included country area (40) and  
363 sampling effort as additional predictor variables in our models. Sampling effort was measured using the

364 metric proposed by (45), which is based on the number of GBIF records per unit area and accounting for  
365 native species richness. For reptiles, fishes and spiders, taxon-specific sampling effort was not available.  
366

367 **Established alien species richness data.** We calculated country-specific levels of invasion based on data  
368 of EAS richness of eight taxonomic groups for which global distribution data were available (plants, ants,  
369 amphibians, reptiles, fishes, birds, mammals and spiders) (15). Following (15), overall EAS richness was  
370 calculated by converting absolute EAS richness to a relative scale by dividing species richness by the  
371 maximum richness over all countries, resulting in values ranging from 0 to 1. Overall alien species  
372 richness for each country was then computed as the mean of relative richness values across taxonomic  
373 groups.

374  
375 **National capacity data.** Data representing countries' capacity for reactive and proactive responses to IAS  
376 was obtained from (19). Proactive national capacity assesses the capacity of a country to prevent or early  
377 contain emerging incursions by IAS. Reactive national capacity accounts for the expertise, resources and  
378 willingness to mitigate the damage from IAS that are present in a country, which is essential to make IAS  
379 policy effective.

380  
381 **Variable selection.** The 12 socio-ecological variables selected to describe the main predictors of  
382 biological invasions (i.e. excluding climatic variables, country area and sampling effort) were interrelated  
383 in complex ways, resulting in collinearities. To keep predictors as independent from each other as  
384 possible and better disentangle their respective effects on the response variables described below, we  
385 imposed internal coherence between variables used to characterize a given predictor. To be coherent,  
386 variables characterizing a predictor had to be more correlated with each other than with variables  
387 characterizing other predictors. Variables that belong to a category but are more correlated with another  
388 likely indicate causal relationships between specific aspects of the two predictors that would cause a high  
389 correlation between predictors if they were included. Although understanding the causal relationships  
390 between predictors and the effects on biological invasions is interesting, this is beyond the scope of this  
391 study. Rather, maximizing independence between the predictors allows to better disentangle their  
392 respective effects on the response variables described below, whereas high correlations would lead to  
393 similar results in the analyses, rendering the analysis of the relationship difficult to interpret. We therefore  
394 discarded political globalization (initially considered to characterize Governance), which was more  
395 strongly correlated with imports (characterizing Trade) than with any of the other variables within its  
396 category (Figure S2); and per capita Gross National Income (initially considered to characterize Trade),  
397 which was more strongly correlated with control of corruption, government effectiveness and rule of law

398 (characterizing Governance) than with imports. The remaining 10 socio-ecological variables were  
399 standardized to mean zero and unit standard deviation and then averaged per predictor for each country  
400 and year. In doing so, we avoided potential collinearity issues, reduced complexity and facilitated the  
401 interpretation of results (46).

402

403 **Analyzing the relationships between predictors and established alien species richness.** We  
404 investigated the relationship between the five predictors and EAS richness per country with linear mixed-  
405 effects models (LMMs) using the lme function from the nlme R package v.3.1 (47, 48). To statistically  
406 identify non-linearities observed in preliminary analyses using splines, we fitted linear, second-order  
407 (quadratic) and third-order (cubic) models for each individual predictor. Quadratic models enabled us to  
408 detect accelerating (i.e. positive coefficients) or decelerating (i.e. negative coefficients) relationships.  
409 Similarly, we used cubic models to identify both accelerating and decelerating relationships across the  
410 range of values for a predictor.

411

412 We also incorporated mean annual temperature, total annual precipitation, mainland or island status of the  
413 country (represented by a categorical variable), as well as country area, sampling effort (ln-transformed)  
414 and their interaction (or only country area when sampling effort was not available for a taxonomic group)  
415 as fixed effects. We used overall EAS richness (ln-transformed to satisfy assumptions of normality of  
416 residuals and variance homogeneity) and EAS richness of each taxonomic group individually (ln [EAS  
417 richness + 1] transformed) as response variables. To account for spatial autocorrelation, we used broad  
418 geographical regions (level 2 nested in level 1 of the Biodiversity Information Standards – TDWG, (45))  
419 as random effects. Alternative generalized linear mixed models using binomial and Poisson link functions  
420 on untransformed response variables provided qualitatively similar results (not shown), but could not be  
421 tested for spatial autocorrelation due to long computation times.

422

423 For each predictor X, we therefore assessed the following three models:

424

425 linear:  $S \sim X + A + E + A * E + T + P + M + (1|TDWG1/TDWG2)$  Eq. 1

426 quadratic:  $S \sim X^2 + X + A + E + A \times E + T + P + M + (1|TDWG1/TDWG2)$  Eq. 2

427 cubic:  $S \sim X^3 + X^2 + X + A + E + A \times E + T + P + M + (1|TDWG1/TDWG2)$  Eq. 3

428

429

430 where S is EAS richness, X is a socio-economic predictor, A is country area, E is sampling effort (A was  
431 used instead of  $A + E + A \times E$  for reptiles, fishes and spiders, for which sampling effort was not

432 available), T is mean annual temperature, P is mean annual precipitation, M is mainland or island status  
433 and TDWG1 and TDWG2 are the levels 1 and 2 of the Biodiversity Information Standards. To avoid  
434 issues of data dredging, and because the focus of this study is on socio-economic predictors, polynomials  
435 were not tested on the spatial and climatic variables.

436

437 We assessed model performance using AICc (49), computed with the AICc function in the AICcmodavg  
438 R package v2.3-1 (50), and using the marginal variance explained after accounting for random effects,  
439 computed with the  $r^2_{\text{nakagawa}}$  function in the performance R package v0.6.1 (51). We reported the  
440 model with the lowest AICc value for each predictor (due to the large number and variety of models  
441 compared, we do not report all  $\Delta\text{AICc}$  values).

442

443 We also computed LMMs incorporating both Governance (G) and Trade (Tr) in the models (using the  
444 linear, quadratic and cubic transformations for both predictors; Eqs 4–6).

445

446 linear:  $S \sim G + Tr + A + E + A \times E + T + P + M + (1|TDWG1/TDWG2)$  Eq. 4

447 quadratic:  $S \sim G^2 + G + Tr^2 + Tr + A + E + A \times E + T + P + M + (1|TDWG1/TDWG2)$  Eq. 5

448 cubic:  $S \sim G^3 + G^2 + G + Tr^3 + Tr^2 + Tr + A + E + A \times E + T + P + M + (1|TDWG1/TDWG2)$  Eq.

449 6

450

451 Finally, for models using Governance and Trade as predictors, we performed analyses for historical  
452 predictor conditions for 1996 and for the annual values averaged between 1996 and 2015 (historical data  
453 were not available for the other three predictors). The same 125 countries were used in all analyses,  
454 permitting comparison with respective models using the 2015 data. A lower AICc value for models using  
455 1996 data than using 2015 data would reveal the historical legacy of these predictors on EAS richness.

456 Alternative models

457

458 In these analyses, we did not combine other predictors than Governance and Trade due to high  
459 collinearity (see results for values). Incorporating additional predictors in exploratory analyses led to  
460 Variance Inflation Factors  $> 3$  in the models (results not shown). Note also that we did not use the axis of  
461 the PCA described above as predictors for two reasons: i) that would have prevented the exploration of  
462 the effects of historical data due to lack of data for other predictors; ii) that enabled us to better explore  
463 the effects of the different predictors on the different response variables we considered (see national  
464 response capacities below).

465

466 **Analyzing the relationships between predictors and national response capacities.** We analyzed the  
467 relevance of the five main predictors of invasions for the ability of countries to control and manage  
468 biological invasions, i.e. their national response capacities (19). We modified Eqs 1–6 using proactive and  
469 reactive national capacities as response variables and removed the biological (T, P, M) and statistical (A,  
470 E) predictors of EAS richness (Eqs 7–12). We hypothesized that Governance, Environmental  
471 Performance and Lifestyle and Education should be positively correlated with proactive capacity of a  
472 country to prevent or rapidly respond to emerging incursions by IAS. As Trade is expected to lead to  
473 more species introductions (14), which in turn should lead to more reactive measures due to rising  
474 awareness of the impacts of IAS, we argued that Trade should show a stronger correlation with the  
475 reactive capacity of countries to mitigate negative impacts caused by IAS already present. As for EAS  
476 richness, models were evaluated with current (2015) and historical (1996) predictor data, and averaged  
477 over the 1996–2015 period.

478

479 linear:  $C \sim X + (1|TDWG1/TDWG2)$  Eq. 7

480 quadratic:  $C \sim X^2 + X + (1|TDWG1/TDWG2)$  Eq. 8

481 cubic:  $C \sim X^3 + X^2 + X + (1|TDWG1/TDWG2)$  Eq. 9

482

483 linear:  $C \sim G + Tr + (1|TDWG1/TDWG2)$  Eq. 10

484 quadratic:  $C \sim G^2 + G + Tr^2 + Tr + (1|TDWG1/TDWG2)$  Eq. 11

485 cubic:  $C \sim G^3 + G^2 + G + Tr^3 + Tr^2 + Tr + (1|TDWG1/TDWG2)$  Eq. 12

486

487 where C is proactive or reactive national capacity and the other notations are as in Eqs 7–12.

488

489 For all models, we tested for residual spatial autocorrelation by constructing correlograms of Moran's I in  
490 relation to increasing distance between country centroids using the spline.correlog function in the ncf R  
491 package v1.2-9 (52). Significance was assessed using 95% confidence intervals, built from 1000  
492 bootstrapped randomizations of the residuals (Figures S6, S7). All statistical analyses were performed  
493 with the R software v. 4.0.3 (48).

494

495 **Visualization of countries in a two-dimensional socio-economic space.** We mapped countries in a two-  
496 dimensional space defined by the 2015 levels of Governance and Trade. To facilitate the interpretation of  
497 results, countries were assigned to different geopolitical regions. To identify groups of countries that  
498 differ distinctly from each other, we applied two hierarchical clustering algorithms based on distance  
499 between countries in this socio-economic space. We used the complete-linkage and the Ward methods in



500 the R function hclust from the default stats package. To evaluate the number of clusters best separating  
501 the countries, we used the function NbClust from the NbClust R Package v3.0 (53), which evaluates the  
502 number of clusters based on 30 different indices.

503

504 We used data from 2015 in the previous analyses because this corresponds to the most recent year for  
505 which EAS richness and national response capacity data were both available; as data for Governance and  
506 Trade were available until 2018, we mapped countries for the full range of data when investigating their  
507 trajectories in the socio-economic space through time.

508

509 **Data Availability.** All data analyzed here are freely available from the original sources provided in Table  
510 1. The data used as predictors for the three time periods (1996, 1996-2015, 2015) have been compiled in a  
511 single CSV file available in supplementary material.

512

513 **Acknowledgements.** This work was funded by the BiodivERsA-Belmont Forum Project “Alien  
514 Scenarios” (GL, BL, SD, DM, FE: FWF project no I 4011-B32; NRP, CPG, EC: Project PCI2018-  
515 092966, funded by FEDER/Ministerio de Ciencia e Innovación – Agencia Estatal de Investigación; MG  
516 and IK: BMBF/PT DLR 01LC1807C; HS: BMBF/PT DLR 01LC1807A; JMJ: BMBF/PT DLR  
517 01LC1807B; FC, CB, CD, AT: ANR-18-EBI4-0004).

518

## 519 **References**

520

- 521 1. C. Bellard, P. Cassey, T. M. Blackburn, Alien species as a driver of recent extinctions. *Biol. Lett.*  
522 **12**, 20150623 (2016).
- 523 2. S. L. Maxwell, R. A. Fuller, T. M. Brooks, J. E. M. Watson, Biodiversity: The ravages of guns,  
524 nets and bulldozers. *Nat. News* **536**, 143 (2016).
- 525 3. R. Seidl, *et al.*, Invasive alien pests threaten the carbon stored in Europe’s forests. *Nat. Commun.*  
526 **9**, 1–10 (2018).
- 527 4. IPBES, *Global assessment report on biodiversity and ecosystem services*, B. ES, S. J, D. S, N. HT,  
528 Eds. (IPBES Secretariat, 2019).
- 529 5. C. Diagne, *et al.*, InvaCost, a public database of the economic costs of biological invasions  
530 worldwide. *Sci. Data* **7**, 1–12 (2020).
- 531 6. D. R. Paini, *et al.*, Global threat to agriculture from invasive species. *Proc. Natl. Acad. Sci.* **113**,  
532 7575 LP – 7579 (2016).
- 533 7. C. J. A. Bradshaw, *et al.*, Massive yet grossly underestimated global costs of invasive insects. *Nat.*

- 534 *Commun.* **7**, 12986 (2016).
- 535 8. H. Seebens, *et al.*, No saturation in the accumulation of alien species worldwide. *Nat. Commun.* **8**,  
536 14435 (2017).
- 537 9. G. Latombe, *et al.*, A four-component classification of uncertainties in biological invasions:  
538 implications for management. *Ecosphere* **10**, e02669 (2019).
- 539 10. F. Essl, *et al.*, Drivers of future alien species impacts: An expert-based assessment. *Glob. Chang.*  
540 *Biol.* (2020).
- 541 11. B. Lenzner, *et al.*, A Framework for Global Twenty-First Century Scenarios and Models of  
542 Biological Invasions. *Bioscience* (2019).
- 543 12. F. Courchamp, *et al.*, Invasion biology: specific problems and possible solutions. *Trends Ecol.*  
544 *Evol.* **32**, 13–22 (2017).
- 545 13. F. Essl, *et al.*, Socioeconomic legacy yields an invasion debt. *Proc. Natl. Acad. Sci.* **108**, 203–207  
546 (2011).
- 547 14. H. Seebens, *et al.*, Global trade will accelerate plant invasions in emerging economies under  
548 climate change. *Glob. Chang. Biol.* **21**, 4128–4140 (2015).
- 549 15. W. Dawson, *et al.*, Global hotspots and correlates of alien species richness across taxonomic  
550 groups. *Nat. Ecol. Evol.* **1**, 186 (2017).
- 551 16. A. Sardain, E. Sardain, B. Leung, Global forecasts of shipping traffic and biological invasions to  
552 2050. *Nat. Sustain.* **2**, 274–282 (2019).
- 553 17. N. Roura-Pascual, *et al.*, Alternative futures for global biological invasions. *bioRxiv*,  
554 2021.01.15.426694 (2021).
- 555 18. UNDP (United Nations Development Programme), “Human development report 2007/2008.”
- 556 19. R. Early, *et al.*, Global threats from invasive alien species in the twenty-first century and national  
557 response capacities. *Nat. Commun.* **7**, 12485 (2016).
- 558 20. D. Kaufmann, A. Kraay, M. Mastruzzi, *The worldwide governance indicators: methodology and*  
559 *analytical issues* (The World Bank, 2010).
- 560 21. T. Evans, P. Zu Ermgassen, T. Amano, K. S. Peh, Does governance play a role in the distribution  
561 of invasive alien species? *Ecol. Evol.* **8**, 1984–1994 (2018).
- 562 22. E. C. Brenton-Rule, R. F. Barbieri, P. J. Lester, Corruption, development and governance  
563 indicators predict invasive species risk from trade. *Proc. R. Soc. B Biol. Sci.* **283**, 20160901  
564 (2016).
- 565 23. M. Almeida-Neto, *et al.*, Invasive grasses and native Asteraceae in the Brazilian Cerrado. *Plant*  
566 *Ecol.* **209**, 109–122 (2010).
- 567 24. A. J. Turbelin, B. D. Malamud, R. A. Francis, Mapping the global state of invasive alien species:

- 568 patterns of invasion and policy responses. *Glob. Ecol. Biogeogr.* **26**, 78–92 (2017).
- 569 25. B. Lenzner, *et al.*, What Will the Future Bring for Biological Invasions on Islands? An Expert-  
570 Based Assessment. *Front. Ecol. Evol.* **8**, 280 (2020).
- 571 26. N. C. Banks, D. R. Paini, K. L. Bayliss, M. Hodda, The role of global trade and transport network  
572 topology in the human-mediated dispersal of alien species. *Ecol. Lett.* **18**, 188–199 (2015).
- 573 27. M. I. Westphal, M. Browne, K. MacKinnon, I. Noble, The link between international trade and the  
574 global distribution of invasive alien species. *Biol. Invasions* **10**, 391–398 (2008).
- 575 28. P. E. Hulme, Trade, transport and trouble: managing invasive species pathways in an era of  
576 globalization. *J. Appl. Ecol.* **46**, 10–18 (2009).
- 577 29. T. M. Blackburn, *et al.*, A proposed unified framework for biological invasions. *Trends Ecol.*  
578 *Evol.* **26**, 333–339 (2011).
- 579 30. M. Rouget, *et al.*, Invasion debt—Quantifying future biological invasions. *Divers. Distrib.* **22**, 445–  
580 456 (2016).
- 581 31. J. A. Crooks, Lag times and exotic species: The ecology and management of biological invasions  
582 in slow-motion1. *Ecoscience* **12**, 316–329 (2005).
- 583 32. S. Aikio, R. P. Duncan, P. E. Hulme, Lag-phases in alien plant invasions: separating the facts from  
584 the artefacts. *Oikos* **119**, 370–378 (2010).
- 585 33. T. Pluess, *et al.*, Which factors affect the success or failure of eradication campaigns against alien  
586 species? *PLoS One* **7**, e48157 (2012).
- 587 34. IMO, “Third IMO Greenhouse Gas Study 2014. Retrieved from International Maritime  
588 Organization (IMO): <http://www.imo.org>” (2015).
- 589 35. OECD/ITF, “Transport Outlook 2017. Retrieved from Organization for Economic Co-operation  
590 and Development (OECD): [https://www.oecd-ilibrary.org/transport/itf-transport-outlook-](https://www.oecd-ilibrary.org/transport/itf-transport-outlook-2017/international-freight_9789282108000-6-en)  
591 [2017/international-freight\\_9789282108000-6-en](https://www.oecd-ilibrary.org/transport/itf-transport-outlook-2017/international-freight_9789282108000-6-en)” (2017).
- 592 36. I. M. D. Rosa, *et al.*, Multiscale scenarios for nature futures. *Nat. Ecol. Evol.* **1**, 1416–1419 (2017).
- 593 37. D. Leclère, *et al.*, Bending the curve of terrestrial biodiversity needs an integrated strategy. *Nature*  
594 **585**, 551–556 (2020).
- 595 38. UN, “The Sustainable Development Goals Report 2019” (2019).
- 596 39. F. Essl, *et al.*, The Convention on Biological Diversity (CBD)’s Post-2020 target on invasive alien  
597 species – what should it include and how should it be monitored? *NeoBiota* **62**, 99–121 (2020).
- 598 40. The World Bank, World Development Indicators (2019).
- 599 41. A. Dreher, Does globalization affect growth? Evidence from a new index of globalization. *Appl.*  
600 *Econ.* **38**, 1091–1110 (2006).
- 601 42. S. Gygli, F. Haelg, N. Potrafke, J.-E. Sturm, The KOF Globalisation Index – revisited. *Rev. Int.*

- 602            *Organ.* **14**, 543–574 (2019).
- 603 43. Cornell University, INSEAD, WIPO, “The Global Innovation Index 2019: Creating Healthy  
604 Lives—The Future of Medical Innovation” (2019).
- 605 44. European Commission, Joint Research Centre, *Demographic and Human Capital Scenarios for  
606 the 21st Century: 2018 assessment for 201 countries*, W. Lutz, A. Goujon, S. KC, M. Stonawski,  
607 N. Stilianakis, Eds. (Publications Office of the European Union, 2018)  
608 <https://doi.org/10.2760/41776>, EUR 29113.
- 609 45. C. Meyer, H. Kreft, R. Guralnick, W. Jetz, Global priorities for an effective information basis of  
610 biodiversity distributions. *Nat. Commun.* **6**, 1–8 (2015).
- 611 46. C. F. Dormann, *et al.*, Collinearity: a review of methods to deal with it and a simulation study  
612 evaluating their performance. *Ecography (Cop.)*. **36**, 27–46 (2013).
- 613 47. J. Pinheiro, D. Bates, S. DebRoy, D. Sarkar, R Core Team, nlme: Linear and Nonlinear Mixed  
614 Effects Models. *R Packag. version 3.1-143* (2019).
- 615 48. R Core Team, R: A language and environment for statistical computing (2019).
- 616 49. J. E. Cavanaugh, Unifying the derivations for the Akaike and corrected Akaike information  
617 criteria. *Stat. Probab. Lett.* **33**, 201–208 (1997).
- 618 50. M. J. Mazerolle, AICcmodavg: Model selection and multimodel inference based on (Q)AIC(c). R  
619 package version 2.3-0. <https://cran.r-project.org/package=AICcmodavg>. (2020).
- 620 51. D. Lüdecke, D. Makowski, P. Waggoner, I. Patil, performance: Assessment of Regression Models  
621 Performance. *CRAN* (2020) <https://doi.org/10.5281/zenodo.3952174>.
- 622 52. O. N. Bjornstad, ncf: Spatial Covariance Functions. R package version 1.2-9. [https://CRAN.R-  
623 project.org/package=ncf](https://CRAN.R-project.org/package=ncf) (2020).
- 624 53. C. Malika, N. Ghazzali, V. Boiteau, A. Niknafs, NbClust: an R package for determining the  
625 relevant number of clusters in a data Set. *J. Stat. Softw* **61**, 1–36 (2014).
- 626
- 627

628 **Tables**

629

630 **Table 1.** Main predictors of biological invasions (as identified by (17)) and their corresponding descriptor  
 631 variables. Note that variables with \* were discarded from analyses (see Methods).

| Predictor  | Relationship with biological invasions                                                                                                                                   | Variable                     | Description                                                                                                                                                                                                                                                            | Source                            |
|------------|--------------------------------------------------------------------------------------------------------------------------------------------------------------------------|------------------------------|------------------------------------------------------------------------------------------------------------------------------------------------------------------------------------------------------------------------------------------------------------------------|-----------------------------------|
| Governance | The political context influences the capacity of a country to vote and apply appropriate policies and management actions to control and prevent the introduction of IAS. | Rule of Law                  | Perception of the extent to which the population has confidence in and abides by the rules of society, and in particular the quality of contract enforcement, property rights, the police, and the courts, as well as the likelihood of crime and violence.            | The World Bank (36)               |
|            |                                                                                                                                                                          | Government Effectiveness     | Perception of the quality of public services, the quality of the civil service and the degree of its independence from political pressures, the quality of policy formulation and implementation, and the credibility of the government's commitment to such policies. | The World Bank (36)               |
|            |                                                                                                                                                                          | Voice and Accountability     | Perception of the extent to which a country's citizens are able to participate in selecting their government, as well as freedom of expression, freedom of association and a free media.                                                                               | The World Bank (36)               |
|            |                                                                                                                                                                          | Control of Corruption        | Perception of the extent to which public power is exercised for private gain, including both petty and grand forms of corruption, as well as "capture" of the state by elites and private interests.                                                                   | The World Bank (36)               |
|            |                                                                                                                                                                          | Political Globalization*     | Summary of the diffusion of countries' government policies and the ability to engage in international political cooperation.                                                                                                                                           | KOF Swiss Economic Institute (37) |
| Trade      | The importation of goods and services into a country facilitates the                                                                                                     | Imports in Good and Services | Value of all goods and other market services received from the rest of the world.                                                                                                                                                                                      | The World Bank (36)               |
|            |                                                                                                                                                                          | Per capita Gross National    | Sum of a country's gross domestic product (GDP) plus                                                                                                                                                                                                                   | The World Bank (36)               |

|                         | introduction of propagules.                                                                                                                                                                                                                                                  | Income (GNI)*                                                                                                                           | net income (positive or negative) from abroad, divided by population size.                                                                                                                                                                                                                                                            |                                                                                                                            |
|-------------------------|------------------------------------------------------------------------------------------------------------------------------------------------------------------------------------------------------------------------------------------------------------------------------|-----------------------------------------------------------------------------------------------------------------------------------------|---------------------------------------------------------------------------------------------------------------------------------------------------------------------------------------------------------------------------------------------------------------------------------------------------------------------------------------|----------------------------------------------------------------------------------------------------------------------------|
| Environment             | Environmental conditions, including disturbance, land cover, pollution, etc., can influence the establishment of alien species.                                                                                                                                              | Environmental Performance Index (EPI)                                                                                                   | Summary of the state of sustainability of countries, based on 32 performance indicators across 11 issue categories (Biodiversity and habitat, Ecosystem services, Fisheries, Water resources, Climate change, Pollution emissions, Agriculture, Waste management, Heavy metals, Sanitation and drinking water and Air quality).       | (50)                                                                                                                       |
| Lifestyle and Education | People’s lifestyle, their connections with other cultures and therefore geographical areas, itself influenced by education, can move and introduce propagules to novel environments. Lifestyle and education are also likely linked to other predictors, such as governance. | Average level of education of the population<br><br>Information Globalization Index (de jure)<br>Cultural Globalization Index (de jure) | Average of the maximum level of education across countries’ inhabitants, using a scale from 1 to 5 to quantify levels of education.<br><br>Summary of countries’ ability to share information with other countries.<br><br>Summary of countries’ openness towards and the ability to understand and adopt foreign cultural influences | European Commission & Joint Research Centre (40)<br>KOF Swiss Economic Institute (37)<br>KOF Swiss Economic Institute (37) |
| Innovation              | Technological innovations can offer means to control and prevent the introduction of alien species, but may also facilitate trade activities and contribute to impact the environment.                                                                                       | Global Innovation Index                                                                                                                 | Summary of countries’ capacity for, and success in, innovation, based on variables from multiple sources.                                                                                                                                                                                                                             | Cornell University, INSEAD, WIPO (39)                                                                                      |

632

633

634

635 **Table 2.** Results of model fitting for explaining EAS richness and national capacities in 125 countries  
 636 based on the small-sample size corrected Akaike Information Criterion (AICc) for 2015. In bold are the  
 637 models with the lowest AICc values. The  $\Delta$ AICc is the difference with the lowest AICc values over all  
 638 predictors and all polynomial forms.  $r^2$  values are the marginal variance. Values in the first column are  
 639 those when only environmental predictors and random effects were included, and all predictors were  
 640 excluded (the marginal  $r^2$  is therefore 0 for the national capacity models). Values between brackets  
 641 indicate the gains in marginal  $r^2$  compared to models with no predictor.

| Response variable                                         | Governance                                                    | Trade                                                                                      | Environment                                                   | Lifestyle and Education                                                                    | Technology                                                    |
|-----------------------------------------------------------|---------------------------------------------------------------|--------------------------------------------------------------------------------------------|---------------------------------------------------------------|--------------------------------------------------------------------------------------------|---------------------------------------------------------------|
| All taxa combined<br>$r^2 = 0.54$<br>$\Delta$ AICc = 48.1 | Quadratic<br>$r^2 = 0.68$<br>(+0.14)<br>$\Delta$ AICc = 44.06 | <b>Quadratic</b><br>$r^2 = \mathbf{0.79}$<br><b>(+0.25)</b><br>$\Delta$ AICc = <b>0.00</b> | Quadratic<br>$r^2 = 0.66$<br>(+0.13)<br>$\Delta$ AICc = 42.55 | Quadratic<br>$r^2 = 0.64$<br>(+0.10)<br>$\Delta$ AICc = 46.28                              | Quadratic<br>$r^2 = 0.62$<br>(+0.08)<br>$\Delta$ AICc = 47.22 |
| Plants<br>$r^2 = 0.45$<br>$\Delta$ AICc = 8.94            | Cubic<br>$r^2 = 0.48$<br>(+0.02)<br>$\Delta$ AICc = 6.00      | <b>Quadratic</b><br>$r^2 = \mathbf{0.54}$<br><b>(+0.09)</b><br>$\Delta$ AICc = <b>0.00</b> | Cubic<br>$r^2 = 0.52$<br>(+0.06)<br>$\Delta$ AICc = 5.97      | Quadratic<br>$r^2 = 0.54$<br>(+0.09)<br>$\Delta$ AICc = 2.99                               | Quadratic<br>$r^2 = 0.46$<br>(+0.00)<br>$\Delta$ AICc = 8.82  |
| Ants<br>$r^2 = 0.66$<br>$\Delta$ AICc = 6.58              | Quadratic<br>$r^2 = 0.64$<br>(-0.02)<br>$\Delta$ AICc = 5.92  | <b>Quadratic</b><br>$r^2 = \mathbf{0.61}$<br><b>(-0.05)</b><br>$\Delta$ AICc = <b>0.00</b> | Quadratic<br>$r^2 = 0.64$<br>(-0.02)<br>$\Delta$ AICc = 3.91  | Quadratic<br>$r^2 = 0.68$<br>(+0.03)<br>$\Delta$ AICc = 0.80                               | Quadratic<br>$r^2 = 0.62$<br>(-0.03)<br>$\Delta$ AICc = 4.70  |
| Amphibians<br>$r^2 = 0.47$<br>$\Delta$ AICc = 14.97       | Cubic<br>$r^2 = 0.53$<br>(+0.06)<br>$\Delta$ AICc = 10.64     | <b>Quadratic</b><br>$r^2 = \mathbf{0.58}$<br><b>(+0.12)</b><br>$\Delta$ AICc = <b>0.00</b> | Quadratic<br>$r^2 = 0.54$<br>(+0.07)<br>$\Delta$ AICc = 9.60  | Quadratic<br>$r^2 = 0.50$<br>(+0.04)<br>$\Delta$ AICc = 12.47                              | Quadratic<br>$r^2 = 0.52$<br>(+0.06)<br>$\Delta$ AICc = 11.84 |
| Reptiles<br>$r^2 = 0.28$<br>$\Delta$ AICc = 26.28         | Cubic<br>$r^2 = 0.35$<br>(+0.06)<br>$\Delta$ AICc = 19.58     | <b>Cubic</b><br>$r^2 = \mathbf{0.46}$<br><b>(+0.18)</b><br>$\Delta$ AICc = <b>0.00</b>     | Quadratic<br>$r^2 = 0.34$<br>(+0.06)<br>$\Delta$ AICc = 17.66 | Quadratic<br>$r^2 = 0.28$<br>(+0.00)<br>$\Delta$ AICc = 20.94                              | Quadratic<br>$r^2 = 0.37$<br>(+0.09)<br>$\Delta$ AICc = 16.71 |
| Fishes<br>$r^2 = 0.29$<br>$\Delta$ AICc = 43.27           | Cubic<br>$r^2 = 0.40$<br>(+0.11)<br>$\Delta$ AICc = 31.15     | <b>Quadratic</b><br>$r^2 = \mathbf{0.56}$<br><b>(+0.27)</b><br>$\Delta$ AICc = <b>0.00</b> | Cubic<br>$r^2 = 0.49$<br>(+0.20)<br>$\Delta$ AICc = 18.89     | Quadratic<br>$r^2 = 0.43$<br>(+0.13)<br>$\Delta$ AICc = 30.18                              | Quadratic<br>$r^2 = 0.41$<br>(+0.12)<br>$\Delta$ AICc = 28.83 |
| Birds<br>$r^2 = 0.52$<br>$\Delta$ AICc = 39.62            | Quadratic<br>$r^2 = 0.61$<br>(+0.08)<br>$\Delta$ AICc = 27.34 | <b>Cubic</b><br>$r^2 = \mathbf{0.70}$<br><b>(+0.17)</b><br>$\Delta$ AICc = <b>0.00</b>     | Quadratic<br>$r^2 = 0.62$<br>(+0.09)<br>$\Delta$ AICc = 20.62 | Quadratic<br>$r^2 = 0.62$<br>(+0.10)<br>$\Delta$ AICc = 19.44                              | Quadratic<br>$r^2 = 0.57$<br>(+0.05)<br>$\Delta$ AICc = 30.29 |
| Mammals<br>$r^2 = 0.53$<br>$\Delta$ AICc = 12.99          | Quadratic<br>$r^2 = 0.61$<br>(+0.07)<br>$\Delta$ AICc = 7.89  | Quadratic<br>$r^2 = 0.60$<br>(+0.07)<br>$\Delta$ AICc = 6.56                               | Quadratic<br>$r^2 = 0.65$<br>(+0.11)<br>$\Delta$ AICc = 0.16  | <b>Quadratic</b><br>$r^2 = \mathbf{0.64}$<br><b>(+0.11)</b><br>$\Delta$ AICc = <b>0.00</b> | Quadratic<br>$r^2 = 0.57$<br>(+0.03)<br>$\Delta$ AICc = 12.58 |
| Spiders<br>$r^2 = 0.36$<br>$\Delta$ AICc = 26.33          | Quadratic<br>$r^2 = 0.47$<br>(+0.11)<br>$\Delta$ AICc = 16.23 | <b>Quadratic</b><br>$r^2 = \mathbf{0.59}$<br><b>(+0.23)</b><br>$\Delta$ AICc = <b>0.00</b> | Quadratic<br>$r^2 = 0.50$<br>(+0.14)<br>$\Delta$ AICc = 11.53 | Quadratic<br>$r^2 = 0.57$<br>(+0.22)<br>$\Delta$ AICc = 6.39                               | Quadratic<br>$r^2 = 0.44$<br>(+0.08)<br>$\Delta$ AICc = 19.94 |
| Proactive national capacity<br>$\Delta$ AICc = 28.28      | Quadratic<br>$r^2 = 0.32$<br>$\Delta$ AICc = 5.92             | Quadratic<br>$r^2 = 0.16$<br>$\Delta$ AICc = 18.89                                         | Quadratic<br>$r^2 = 0.25$<br>$\Delta$ AICc = 17.26            | <b>Quadratic</b><br>$r^2 = \mathbf{0.47}$<br>$\Delta$ AICc = <b>0.00</b>                   | Quadratic<br>$r^2 = 0.23$<br>$\Delta$ AICc = 15.40            |
| Reactive national capacity<br>$\Delta$ AICc = 18.53       | Quadratic<br>$r^2 = 0.11$<br>$\Delta$ AICc = 15.26            | <b>Quadratic</b><br>$r^2 = \mathbf{0.26}$<br>$\Delta$ AICc = <b>0.00</b>                   | Quadratic<br>$r^2 = 0.16$<br>$\Delta$ AICc = 12.62            | Quadratic<br>$r^2 = 0.33$<br>$\Delta$ AICc = 2.30                                          | Quadratic<br>$r^2 = 0.15$<br>$\Delta$ AICc = 12.62            |

642



643 **Figures**

644

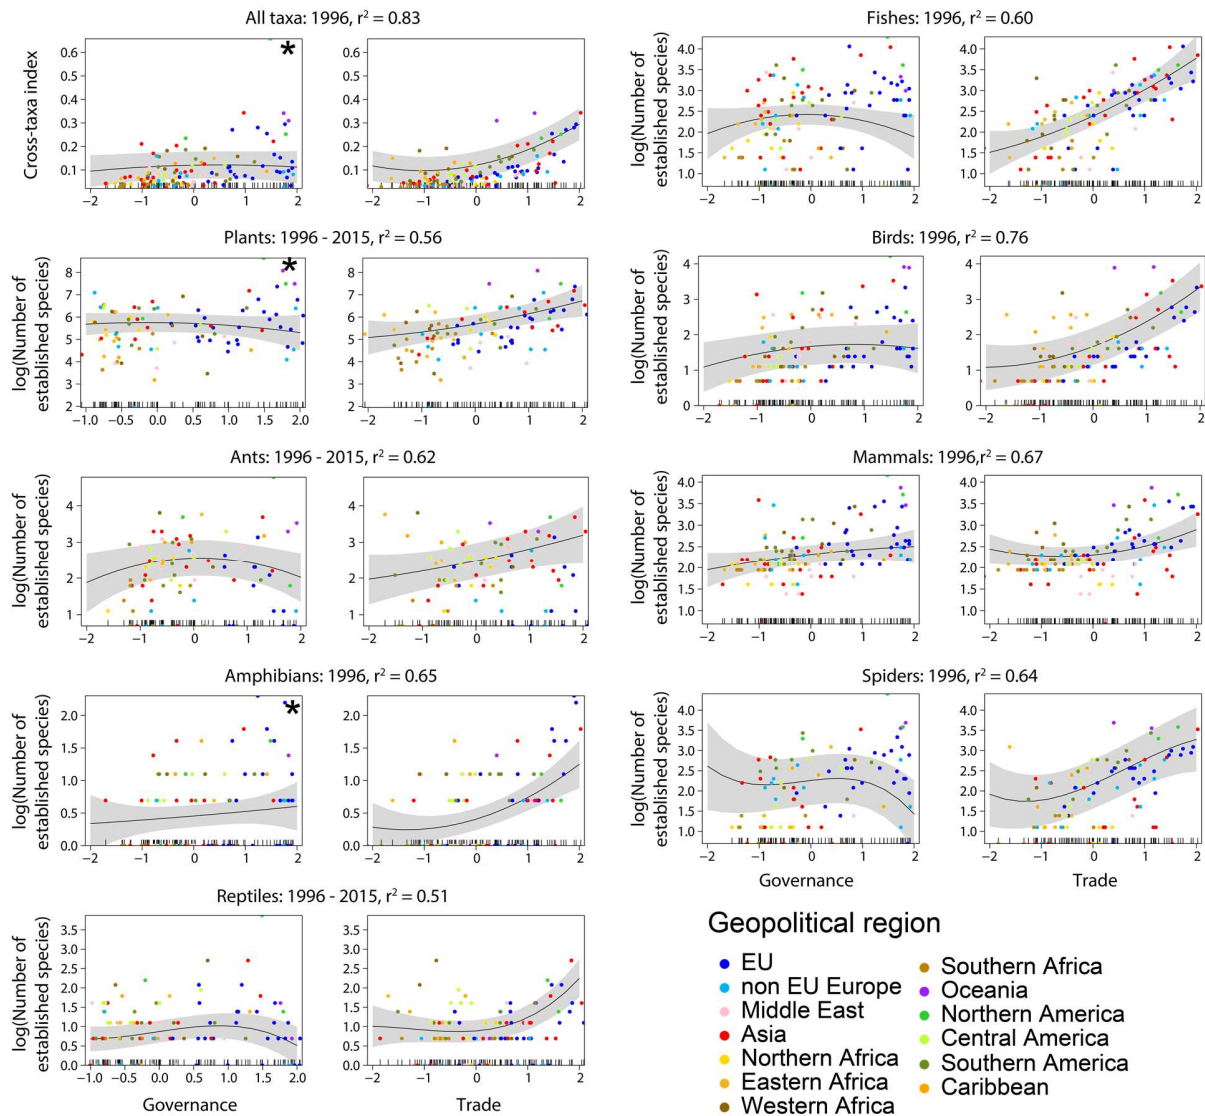

645

646

647

648

649

650

651

652

653

654

**Figure 1.** Relationships between the Governance and Trade predictors and the number of EAS in 125 countries, when both predictors were included in linear mixed-effects models. For each taxonomic group, the year or combination of years generating the lowest AICc were selected, and the marginal  $r^2$  is reported. The number of EAS was controlled for by country area, sampling effort, mean annual temperature and total annual precipitation. Different colors indicate geopolitical regions the countries belong to. Asterisks indicate that a predictor did not improve a model (i.e. a single-predictor model had lower AICc than a two-predictor model).

655

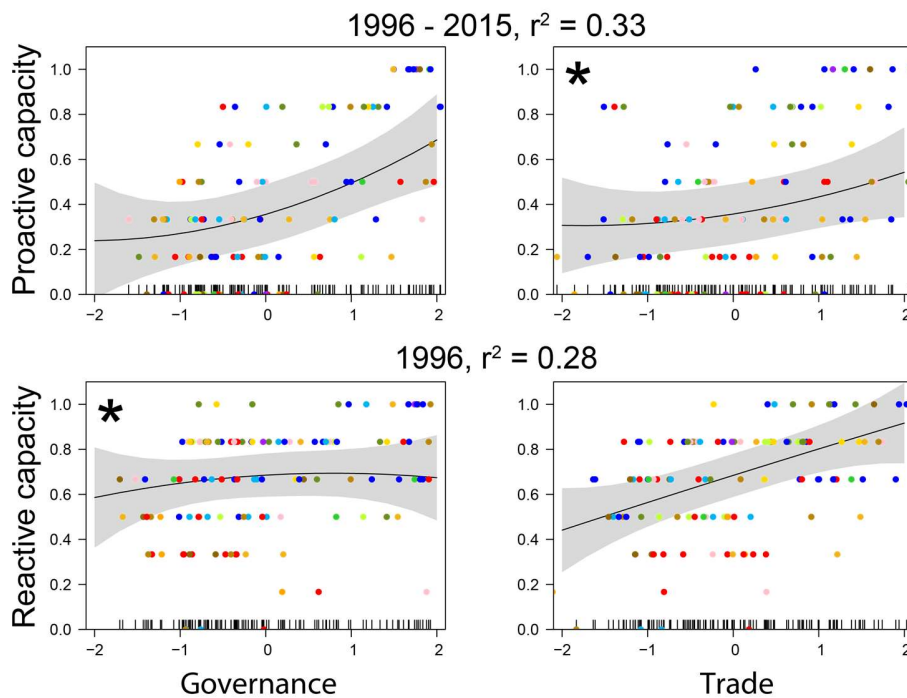

656

657 **Figure 2.** Relationships between Governance and Trade, and national capacities to mitigate the impacts of  
658 biological invasions, when both predictors were included in linear mixed models. The year or  
659 combination of years generating the lowest AICc were selected, the marginal  $r^2$  is reported. Different  
660 colors indicate the geopolitical regions countries belong to (for legend, see Figure 1). Asterisks indicate  
661 that the predictor did not significantly explain established alien species richness (i.e. when linear models  
662 with a single predictor generated a lower AIC than when both predictors were included). Rug plots on the  
663 inside of the X-axes show the distributions of the data points along individual predictor gradients.

664

665

666

667

668

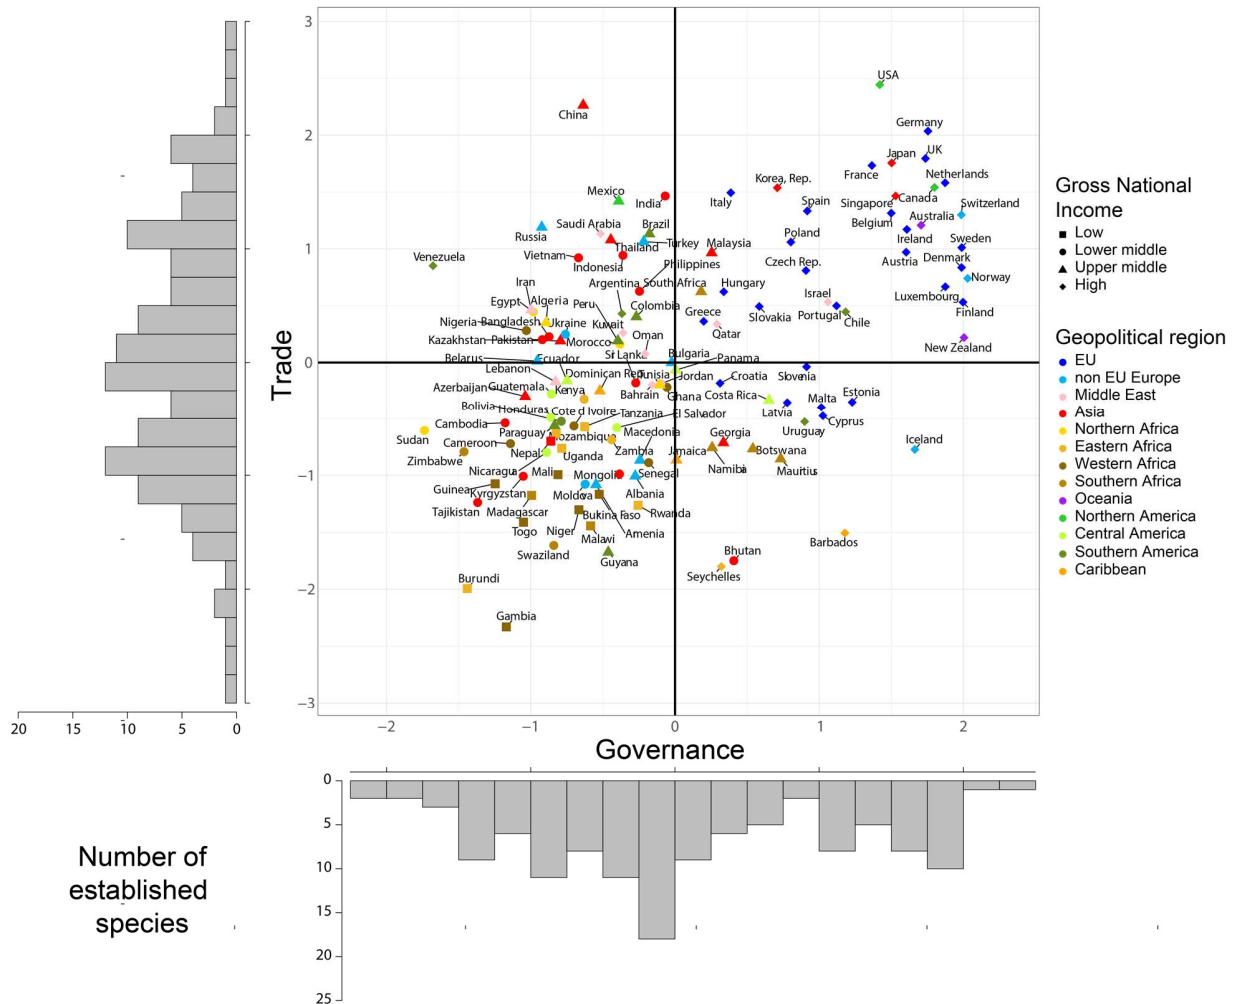

669

670 **Figure 3.** The 125 countries organized in the two-dimensional socio-economic space based on recent

671 (2015) Governance and Trade data. The histograms show the distribution of countries based on

672 Governance and Trade. The bold horizontal and vertical lines indicate the origin axes, which correspond

673 to the centroid of the country distribution. Gross National Income categories are based on the World Bank

674 classification (36).

675

676

677

678

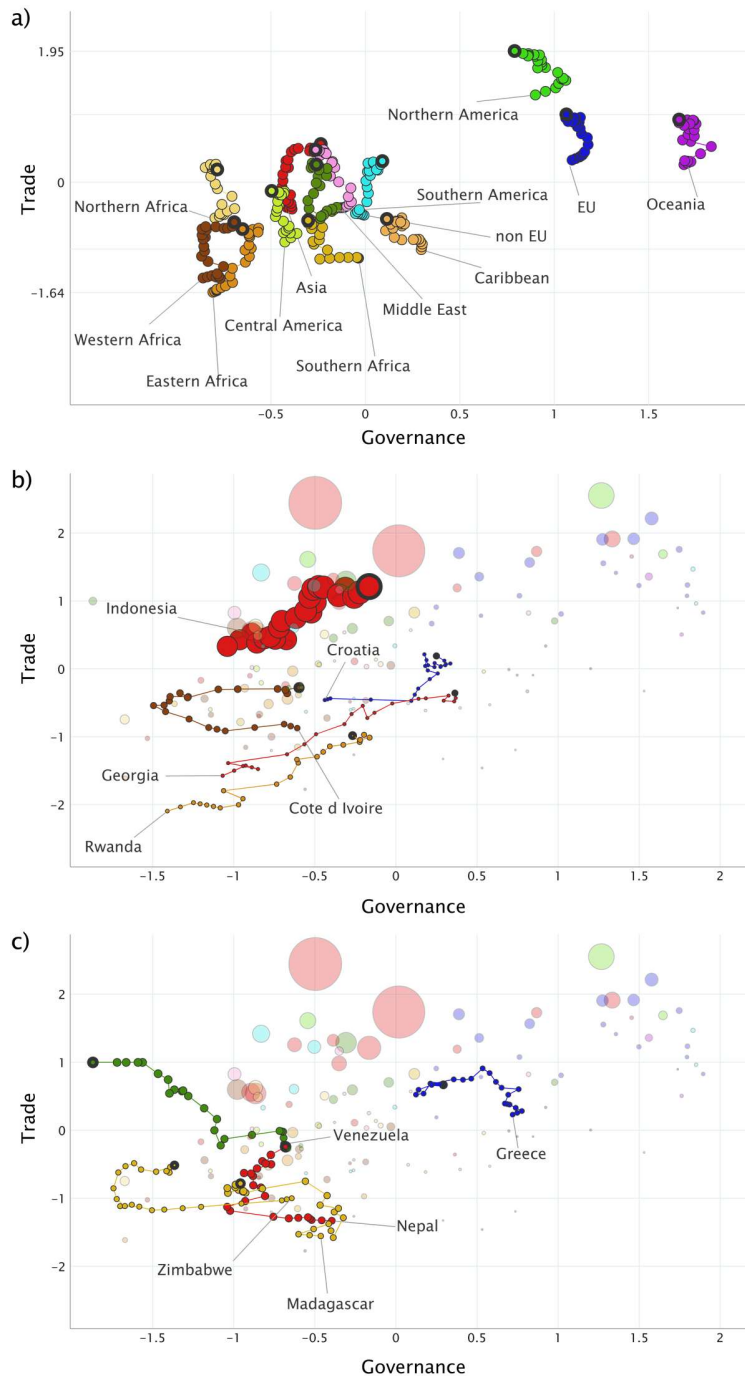

679

680 **Figure 4.** Changes in Governance and Trade between 1996 and 2018 for 125 countries. a) Average  
681 changes for main geopolitical regions of the world. b) Changes for countries with the largest increase of  
682 Governance between 1996 and 2018. c) Changes for countries with the largest decrease of Governance  
683 between 1996 and 2018. Region and country names point towards positions in 1996, and thick bubbles  
684 represent positions in 2018. Bubble size illustrates human population size. Visualizations were created  
685 using Gapminder ([www.gapminder.org](http://www.gapminder.org)).
